# Supplementary material
Source: MDPI journal article supplement (https://www.mdpi.com/2073-4441/15/5/858)
Supplement: s1 [file s1]

Supplementary Table S1.

Species richness of freshwater Protists, Rotifera, Cladocera an Copepoda recorded in Mexico (Aladro-Lubel et al., 2007, 2009; Albores-Celorio, 1969; Arevalo-Navarro, 1999; Bravo-Hollis, 1922, 1924; Cabral-Dorado, 2006; Elliot and Hayes, 1955; Figueroa-Torres and Moreno-Ruíz, 2003; Flores-Flores, 2012; Flores-Orta, 1983; González-Labastida, 1995; Hernández-Anaya, 1981; Kusel-Fetzmann, 1973; López-Ochoterena, 1962, 1964, 1965; López-Ochoterena and Barajas, 1964; López-Ríos, 1972; Lugo-Vázquez, 1993; Macek et al., 2022; Madrazo-Garibay and López-Ochoterena, 1973, 1985, 1986, 1990; Marrón-Aguilar and López-Ochoterena, 1969; Méndez-Sánchez, 2014, 2017; Méndez-Sánchez et al., 2018; Mendoza-González, 1973; Moreno-Ruíz, 1985; Nomdedeu and López-Ochoterena, 1988; Osorio-Tafall, 1941, 1942, 1944; Pérez-Reyes and Salas Gómez, 1960, 1961; Peštová et al., 2008; Ponce-Márquez et al., 2019; Potekhin and Mayén-Estrada, 2020; Ramírez de Guerrero, 1970; Saadi-González, 2018; Sámano and Sokoloff, 1931; Sánchez-Rodríguez et al., 2011; Sigala-Regalado, 2008; Sokoloff, 1930a, b, 1931, 1936; Tiscareño-Silva, 2008; Rico-Martínez & Silva-Briano; 1993; Dussart & Defaye 1995; Sarma *et al.*, 1996; Suárez-Morales *et al.*, 1996; Sarma & Elías-Gutiérrez, 1997; Sarma & Elías-Gutiérrez, 1998; Suárez-Morales & Reid, 1998; Elías-Gutiérrez *et al.*, 1999; Sarma, 1999; Sarma & Elías-Gutiérrez, 1999a; Sarma & Elías-Gutiérrez, 1999b; Suárez-Morales *et al.*, 2000; Elías-Gutiérrez *et al.*, 2001; Suárez-Morales & Gutiérrez-Aguirre, 2001; Elías-Gutiérrez & Suárez-Morales, 2003; Garfias-Espejo & Elías-Gutiérrez, 2003; Suárez-Morales & Elías-Gutiérrez 2003; Suárez-Morales & Reid 2003; Suárez-Morales, 2004; García-Morales & Elías-Gutiérrez, 2004; Sinev *et al.*, 2005; Suárez-Morales & Iliffe, 2005; Elías-Gutiérrez *et al.*, 2006; García-Morales & Elías-Gutiérrez, 2007; Segers, 2007; Silva-Briano *et al.* 2007; Elías-Gutiérrez *et al.*, 2008; Elías-Gutiérrez & Valdéz-Moreno, 2008; Mercado-Salas *et al.*, 2009; Mercado-Salas & Suárez-Morales, 2009; Nandini *et al.*, 2009; Suárez-Morales & Walsh, 2009; Suárez-Morales *et al.*, 2010; Mercado-Salas & Suárez-Morales 2011; Sinev & Silva-Briano, 2012; García-Morales & Elías-Gutiérrez, 2013; Gutiérrez-Aguirre *et al.*, 2013; Gutiérrez-Aguirre & Cervantes-Martínez, 2013; Mercado-Salas & Álvarez-Silva, 2013; Mercado-Salas *et al.*, 2013; Sinev & Zawiska, 2013; Mercado-Salas & Suárez-Morales 2014; Gutiérrez-Aguirre *et al.*, 2014; Mercado-Salas *et al.*, 2015; Gutiérrez-Aguirre & Cervantes-Martínez, 2016; Mercado-Salas *et al.*, 2018; Elías-Gutiérrez *et al.*, 2019; Gutiérrez-Aguirre *et al.*, 2020; Suárez-Morales *et al.*, 2020; Sarma *et al.*, 2021).

| Order            | Number of Families | Number of Genera | Species Richness (number of species by Genera between brackets)  | Total species |
|------------------|--------------------|------------------|------------------------------------------------------------------|---------------|
| Armophorida      | 2                  | 3                | <i>Caenomorpha</i> (2) <i>Brachonella</i> (1) <i>Metopus</i> (2) | 5             |
| Bryophryida      | 1                  | 1                | <i>Parabryophrya</i> (1)                                         | 1             |
| Bursariomorphida | 1                  | 1                | <i>Bursaria</i> (1)                                              | 1             |
| Colpodida        | 1                  | 1                | <i>Colpoda</i> (5)                                               | 5             |

|                  |   |    |                                                                                                                                                                                                                                                                                                                                                                               |    |
|------------------|---|----|-------------------------------------------------------------------------------------------------------------------------------------------------------------------------------------------------------------------------------------------------------------------------------------------------------------------------------------------------------------------------------|----|
| Cyrtolophosidida | 1 | 1  | <i>Platyophrya</i> (1)                                                                                                                                                                                                                                                                                                                                                        | 1  |
| Cyclotrichida    | 1 | 2  | <i>Mesodinium</i> (2) <i>Askenasia</i> (1)                                                                                                                                                                                                                                                                                                                                    | 3  |
| Haptorida        | 8 | 16 | <i>Chaenea</i> (1) <i>Actinobolina</i> (2) <i>Belonophrya</i> (1) <i>Didinium</i> (1) <i>Monodinium</i> (1) <i>Enchelydium</i> (1) <i>Enchelys</i> (1) <i>Ileonema</i> (1) <i>Lacrymaria</i> (3) <i>Neobryophyllum</i> (1) <i>Spathidium</i> (2) <i>Paradileptus</i> (1) <i>Pseudomonilicaryon</i> (1) <i>Rimaleptus</i> (1) <i>Trachelius</i> (1) <i>Trachelophyllum</i> (1) | 20 |
| Pleurostomatida  | 2 | 5  | <i>Amphileptus</i> (3) <i>Apoamphileptus</i> (1) <i>Kentrophyllum</i> (1) <i>Litonotus</i> (4) <i>Loxophyllum</i> (1)                                                                                                                                                                                                                                                         | 10 |
| Microthoracida   | 2 | 3  | <i>Leptopharynx</i> (1) <i>Drepanomonas</i> (1) <i>Microthorax</i> (1)                                                                                                                                                                                                                                                                                                        | 3  |
| Nassulida        | 1 | 2  | <i>Nassula</i> (2) <i>Obertrumia</i> (1)                                                                                                                                                                                                                                                                                                                                      | 3  |
| Tetrahymenida    | 3 | 4  | <i>Glaucoma</i> (3) <i>Monochilum</i> (1) <i>Tetrahymena</i> (2) <i>Colpidium</i> (2)                                                                                                                                                                                                                                                                                         | 8  |
| Tintinnida       | 5 | 7  | <i>Amphorellopsis</i> (1) <i>Eutintinnus</i> (3) <i>Favella</i> (2) <i>Stenosemella</i> (1) <i>Tintinnopsis</i> (9) <i>Codonella</i> (1) <i>Tintinnidium</i> (1)                                                                                                                                                                                                              | 18 |
| Peniculida       | 5 | 5  | <i>Clathrostoma</i> (1) <i>Frontonia</i> (2) <i>Lembadion</i> (1) <i>Paramecium</i> (12) <i>Stokesia</i> (1)                                                                                                                                                                                                                                                                  | 17 |
| Urocentrida      | 1 | 1  | <i>Urocentrum</i> (1)                                                                                                                                                                                                                                                                                                                                                         | 1  |
| Philasterida     | 3 | 6  | <i>Cinetochilum</i> (1) <i>Platynematum</i> (1) <i>Sathrophilus</i> (1) <i>Dexiotricha</i> (1) <i>Loxocephalus</i> (1) <i>Uronema</i> (2)                                                                                                                                                                                                                                     | 7  |
| Pleuronematida   | 4 | 6  | <i>Calypotricha</i> (1) <i>Ctedoctema</i> (1) <i>Cyclidium</i> (8) <i>Isocyclidium</i> (1) <i>Protocyclidium</i> (1) <i>Pleuronema</i> (1)                                                                                                                                                                                                                                    | 13 |
| Sessilida        | 1 | 1  | <i>Pelagovorticella</i> (1)                                                                                                                                                                                                                                                                                                                                                   | 1  |
| Chlamyodontida   | 2 | 4  | <i>Chilodonella</i> (3) <i>Phascolodon</i> (1) <i>Trithigmostoma</i> (1) <i>Chlamydonellopsis</i> (1)                                                                                                                                                                                                                                                                         | 6  |
| Dysteriida       | 2 | 2  | <i>Trochilia</i> (1) <i>Trochilioides</i> (1)                                                                                                                                                                                                                                                                                                                                 | 2  |
| Odontostomatida  | 2 | 2  | <i>Discomorphella</i> (1) <i>Atopodinium</i> (1)                                                                                                                                                                                                                                                                                                                              | 2  |
| Plagiopylida     | 2 | 2  | <i>Plagiopyla</i> (1) <i>Trimyema</i> (1)                                                                                                                                                                                                                                                                                                                                     | 2  |
| Incertae sedis   | 1 | 1  | <i>Malacophrys</i> (1)                                                                                                                                                                                                                                                                                                                                                        | 1  |
| Prorodontida     | 4 | 5  | <i>Coleps</i> (5) <i>Holophrya</i> (1) <i>Prorodon</i> (3) <i>Bursellopsis</i> (1) <i>Urotricha</i> (2)                                                                                                                                                                                                                                                                       | 12 |
| Choreotrichida   | 1 | 2  | <i>Rimostrombidium</i> (2) <i>Strobilidium</i> (2)                                                                                                                                                                                                                                                                                                                            | 4  |
| Euplotida        | 2 | 2  | <i>Aspidisca</i> (3) <i>Euplotes</i> (12)                                                                                                                                                                                                                                                                                                                                     | 15 |
| Strombidiida     | 1 | 2  | <i>Limnostrombidium</i> (1) <i>Strombidium</i> (2)                                                                                                                                                                                                                                                                                                                            | 3  |
| Sporadotrichida  | 3 | 11 | <i>Gonostomum</i> (1) <i>Halteria</i> (1) <i>Pelagohalteria</i> (1) <i>Apoamphisiella</i> (1) <i>Apogastrostyla</i> (1) <i>Gastrostyla</i> (1) <i>Onychodromus</i> (1) <i>Oxytricha</i> (2) <i>Stylonychia</i> (6) <i>Tachysoma</i> (1) <i>Urosoma</i> (1)                                                                                                                    | 17 |
| Stichotrichida   | 2 | 2  | <i>Cladotricha</i> (1) <i>Stichotricha</i> (1)                                                                                                                                                                                                                                                                                                                                | 2  |

|                   |    |    |                                                                                                                                                                                                                                                                                                                                                                                                                   |     |
|-------------------|----|----|-------------------------------------------------------------------------------------------------------------------------------------------------------------------------------------------------------------------------------------------------------------------------------------------------------------------------------------------------------------------------------------------------------------------|-----|
| Urostylida        | 2  | 5  | <i>Pseudokeronopsis</i> (1) <i>Anteholosticha</i> (1) <i>Holosticha</i> (1) <i>Uroleptus</i> (4) <i>Urostyla</i> (1)                                                                                                                                                                                                                                                                                              | 8   |
| Heterotrichida    | 5  | 7  | <i>Anigsteinia</i> (1) <i>Blepharisma</i> (4) <i>Pseudoblepharisma</i> (1) <i>Climacostomum</i> (1)<br><i>Linostomella</i> (1) <i>Spirostomum</i> (3) <i>Stentor</i> (8)                                                                                                                                                                                                                                          | 19  |
| Loxodida          | 1  | 1  | <i>Loxodes</i> (3)                                                                                                                                                                                                                                                                                                                                                                                                | 3   |
| Prostomatida      | 1  | 1  | <i>Kentrophoros</i> (1)                                                                                                                                                                                                                                                                                                                                                                                           | 1   |
| Euglenida         | 2  | 4  | <i>Anisonema</i> (3) <i>Notosolenus</i> (4) <i>Astasia</i> (3) <i>Marsupiogaster</i> (1)                                                                                                                                                                                                                                                                                                                          | 11  |
| Heteronematida    | 2  | 4  | <i>Entosiphon</i> (1) <i>Heteronema</i> (1) <i>Peranema</i> (1) <i>Urceolus</i> (1)                                                                                                                                                                                                                                                                                                                               | 4   |
| Bodonida          | 1  | 2  | <i>Bodo</i> (5) <i>Parabodo</i> (1)                                                                                                                                                                                                                                                                                                                                                                               | 6   |
| Gonyaulacales     | 1  | 1  | <i>Ceratium</i> (5)                                                                                                                                                                                                                                                                                                                                                                                               | 5   |
| Gymnodiniales     | 2  | 2  | <i>Gymnodinium</i> (2) <i>Biecheleria</i> (1)                                                                                                                                                                                                                                                                                                                                                                     | 3   |
| Peridinales       | 2  | 5  | <i>Peridinium</i> (7) <i>Peridiniopsis</i> (1) <i>Dinosphaera</i> (1) <i>Glenodinium</i> (1) <i>Parvodinium</i> (4)                                                                                                                                                                                                                                                                                               | 14  |
| Thoracosphaerales | 1  | 1  | <i>Naiadinium</i> (1)                                                                                                                                                                                                                                                                                                                                                                                             | 1   |
| Lophodinales      | 1  | 1  | <i>Lophodinium</i> (1)                                                                                                                                                                                                                                                                                                                                                                                            | 1   |
| Glissomonadida    | 1  | 1  | <i>Heteromita</i> (1)                                                                                                                                                                                                                                                                                                                                                                                             | 1   |
| Acanthocystida    | 2  | 2  | <i>Acanthocystis</i> (2) <i>Raphidocystis</i> (1)                                                                                                                                                                                                                                                                                                                                                                 | 3   |
| Actinophryida     | 1  | 2  | <i>Actinophrys</i> (1) <i>Actinosphaerium</i> (2)                                                                                                                                                                                                                                                                                                                                                                 | 3   |
| Centrohelida      | 2  | 2  | <i>Chlamydaster</i> (1) <i>Heterophrys</i> (1)                                                                                                                                                                                                                                                                                                                                                                    | 2   |
| Pedinellales      | 1  | 1  | <i>Ciliophrys</i> (1)                                                                                                                                                                                                                                                                                                                                                                                             | 1   |
| Granuloreticulosa | 1  | 1  | <i>Gymnoprhyis</i> (1)                                                                                                                                                                                                                                                                                                                                                                                            | 1   |
| Desmothoracida    | 1  | 2  | <i>Hedriocystis</i> (1) <i>Monomastigocystis</i> (1)                                                                                                                                                                                                                                                                                                                                                              | 2   |
| Rotosphaerida     | 1  | 3  | <i>Lithocolla</i> (1) <i>Pompholyxophrys</i> (1) <i>Pinaciophora</i> (1)                                                                                                                                                                                                                                                                                                                                          | 3   |
| Raphidista        | 1  | 1  | <i>Raphidiophrys</i> (2)                                                                                                                                                                                                                                                                                                                                                                                          | 2   |
| Adinetida         | 1  | 1  | <i>Adineta</i> (1)                                                                                                                                                                                                                                                                                                                                                                                                | 1   |
| Philodinida       | 1  | 5  | <i>Dissotrocha</i> (1), <i>Macrotrachela</i> (1), <i>Philodina</i> (3), <i>Pleuretra</i> (1), <i>Rotatoria</i> (5)                                                                                                                                                                                                                                                                                                | 11  |
| Collothecacea     | 2  | 4  | <i>Atrochus</i> (1), <i>Cupelopagis</i> (1), <i>Collotheca</i> (9), <i>Stephanoceros</i> (1)                                                                                                                                                                                                                                                                                                                      | 12  |
| Flosculariaceae   | 5  | 13 | <i>Pompholyx</i> (2), <i>Testudinella</i> (7), <i>Limnias</i> (2), <i>Octotrocha</i> (1), <i>Ptygura</i> (13),<br><i>Sinantherina</i> (3), <i>Conochilus</i> (5), <i>Hexarthra</i> (6), <i>Filinia</i> (7), <i>Horaella</i> (1),<br><i>Beauchampia</i> (1), <i>Floscularia</i> (1), <i>Trochosphaera</i> (1)                                                                                                      | 50  |
| Ploima            | 18 | 54 | <i>Cyrtonia</i> (1), <i>Epiphanes</i> (4), <i>Proalides</i> (2), <i>Anuraeopsis</i> (2), <sup>+</sup> <i>Brachionus</i> (22),<br><sup>+</sup> <i>Keratella</i> (15), <i>Plationus</i> (2), <sup>+</sup> <i>Platytas</i> (2), <i>Kellicottia</i> (2), <i>Notholca</i> (6),<br><i>Beauchampiella</i> (1), <i>Dipleuchlanis</i> (2), <sup>+</sup> <i>Euchlanis</i> (9), <i>Tripleuchlanis</i> (1), <i>Lophocaris</i> | 329 |

|               |   |    |                                                                                                                                                                                                                                                                                                                                                                                                                                                                                                                                                                                                                                                                                                                                                                                                                                                                                                                                                                                                                                          |     |
|---------------|---|----|------------------------------------------------------------------------------------------------------------------------------------------------------------------------------------------------------------------------------------------------------------------------------------------------------------------------------------------------------------------------------------------------------------------------------------------------------------------------------------------------------------------------------------------------------------------------------------------------------------------------------------------------------------------------------------------------------------------------------------------------------------------------------------------------------------------------------------------------------------------------------------------------------------------------------------------------------------------------------------------------------------------------------------------|-----|
|               |   |    | (2), <sup>+</sup> <i>Mytilina</i> (4), <i>Macrochaetus</i> (4), <i>Trichotria</i> (2), <i>Wolga</i> (1), <i>Colurella</i> (6), <i>Lepadella</i> (21), <i>Squatinella</i> (1), <sup>+</sup> <i>Ascomorpha</i> (3), <i>Gastropus</i> (2), <sup>+</sup> <i>Lecane</i> (69), <i>Proales</i> (9), <i>Wulfertia</i> (1), <i>Lindia</i> (4), <i>Enteroplea</i> (1), <i>Eosphora</i> (5), <i>Eothinia</i> (2), <i>Cephalodella</i> (22), <i>Monommata</i> (2), <i>Notommata</i> (10), <i>Pleurotrocha</i> (1), <i>Resticula</i> (3), <i>Sphyrias</i> (1), <i>Taphrocampa</i> (2), <i>Tetrasiphon</i> (1), <i>Itura</i> (3), <i>Scaridium</i> (2), <i>Ascomorphella</i> (1), <i>Trichocerca</i> (31), <i>Polyarthra</i> (8), <i>Ploesoma</i> (1), <i>Synchaeta</i> (9), <sup>+</sup> <i>Asplanchna</i> (8), <i>Asplanchnopus</i> (2), <i>Dicranophorus</i> (5), <i>Dicranophoroides</i> (2), <i>Aspelta</i> (3), <i>Encentrum</i> (3), <i>Paradicranophorus</i> (1)                                                                               |     |
| Ctenopoda     | 1 | 5  | <i>Diaphanosoma</i> (5), <i>Latonopsis</i> (1), <i>Pseudosida</i> (2), <i>Sida</i> (1), <i>Sarsilatona</i> (1)                                                                                                                                                                                                                                                                                                                                                                                                                                                                                                                                                                                                                                                                                                                                                                                                                                                                                                                           | 10  |
| Anomopoda     | 7 | 42 | <i>Daphnia</i> ( <i>Ctenodaphnia</i> ) (2), <i>D. (Daphnia)</i> (16), <i>Ceriodaphnia</i> (8), <i>Simocephalus</i> (5), <i>Scapholeberis</i> (5), <sup>+</sup> <i>Moina</i> (12), <i>Moinodaphnia</i> (1), <i>Eubosmina</i> (4), <i>Bosmina</i> (2), <i>Bosminopsis</i> (1), <i>Ilyocryptus</i> (5), <i>Macrothrix</i> (13), <i>Onchobunops</i> (1), <i>Guernella</i> (1), <i>Streblocerus</i> (1), <i>Grimaldina</i> (1), <i>Eurycercus</i> (2), <i>Pleuroxus</i> (2), <i>Picripleuroxus</i> (1), <i>Alonella</i> (1), <i>Dadaya</i> (1), <i>Disparalona</i> (1), <i>Chydorus</i> (4), <i>Pseudochydorus</i> (1), <i>Ephemeroporus</i> (5), <i>Notoalona</i> (1), <i>Dunhevedia</i> (3), <i>Leberis</i> (3), <i>Nicsmirnovius</i> (1), <i>Alona</i> (14), <i>Ovalona</i> (2), <i>Alpinalona</i> (1), <i>Coronatella</i> (1), <i>Spinalona</i> (1), <i>Karualona</i> (2), <i>Oxyurella</i> (3), <i>Acroperus</i> (1), <i>Camptocercus</i> (1), <i>Graptoleberis</i> (1), <i>Leydigia</i> (6), <i>Leydigiopsis</i> (1), <i>Kurzia</i> (4) | 142 |
| Anostraca     | 4 | 4  | <i>Artemia</i> (1), <i>Branchinecta</i> (6), <i>Streptocephalus</i> (12), <i>Thamnocephalus</i> (2).                                                                                                                                                                                                                                                                                                                                                                                                                                                                                                                                                                                                                                                                                                                                                                                                                                                                                                                                     | 21  |
| Notostraca    | 1 | 2  | <i>Triops</i> (1), <i>Lepidurus</i> (1).                                                                                                                                                                                                                                                                                                                                                                                                                                                                                                                                                                                                                                                                                                                                                                                                                                                                                                                                                                                                 | 2   |
| Cyclestherida | 1 | 1  | <i>Cyclestheria</i> (1).                                                                                                                                                                                                                                                                                                                                                                                                                                                                                                                                                                                                                                                                                                                                                                                                                                                                                                                                                                                                                 | 1   |
| Laevicaudata  | 1 | 2  | <i>Lynceus</i> (2), <i>Paralimnetis</i> (1).                                                                                                                                                                                                                                                                                                                                                                                                                                                                                                                                                                                                                                                                                                                                                                                                                                                                                                                                                                                             | 3   |
| Spinicaudata  | 4 | 5  | <i>Caenestheriella</i> (1), <i>Cyzicus</i> (2), <i>Eocyclus</i> (2), <i>Leptestheria</i> (1), <i>Eulimnadia</i> (5)                                                                                                                                                                                                                                                                                                                                                                                                                                                                                                                                                                                                                                                                                                                                                                                                                                                                                                                      | 11  |
| Calanoida     | 4 | 11 | <i>Osphranticum</i> (1), <i>Eurytemora</i> (1), <i>Pseudodiaptomus</i> (1), <i>Microdiaptomus</i> (1), <i>Agladiaptomus</i> (1), <i>Arctodiaptomus</i> (1), <i>Leptodiaptomus</i> (7), <sup>+</sup> <i>Mastigodiaptomus</i> (13), <i>Priodiaptomus</i> (1), <i>Hesperodiaptomus</i> (1), <i>Skistodiaptomus</i> (2)                                                                                                                                                                                                                                                                                                                                                                                                                                                                                                                                                                                                                                                                                                                      | 30  |
| Cyclopoida    | 1 | 19 | <i>Halicyclops</i> (2), <i>Prehencocyclops</i> (3), <i>Ectocyclops</i> (2), <i>Eucyclops</i> (17), <i>Paracyclops</i> (5), <i>Homocyclops</i> (1), <i>Tropocyclops</i> (5), <i>Macrocyclus</i> (2), <i>Orthocyclops</i> (1), <i>Apocyclops</i> (3), <i>Thermocyclops</i> (3), <i>Mesocyclops</i> (12), <i>Megacyclops</i> (2), <i>Acanthocyclops</i> (9), <i>Diacyclops</i> (5), <i>Metacyclops</i> (2), <i>Microcyclops</i> (5), <i>Neutrocyclops</i> (1), <i>Allocyclops</i> (1)                                                                                                                                                                                                                                                                                                                                                                                                                                                                                                                                                       | 82  |

|               |   |    |                                                                                                                                                                                                                                                                                                                            |    |
|---------------|---|----|----------------------------------------------------------------------------------------------------------------------------------------------------------------------------------------------------------------------------------------------------------------------------------------------------------------------------|----|
| Harpacticoida | 5 | 11 | <i>Nitokra</i> (6), <i>Nitocrella</i> (1), <i>Parapseudoleptomesochra</i> (1), <i>Stygonitocrella</i> (1), <i>Attheyella</i> ( <i>Mrazekiella</i> ) (1), <i>Bryocamptus</i> ( <i>Bryocamptus</i> ) (1), <i>Elaphoidella</i> (3), <i>Moraria</i> (1), <i>Leptocaris</i> (1), <i>Schizopera</i> (1), <i>Cletocamptus</i> (4) | 21 |
|---------------|---|----|----------------------------------------------------------------------------------------------------------------------------------------------------------------------------------------------------------------------------------------------------------------------------------------------------------------------------|----|

Because of the genetic divergence in genes COI or 12S rDNA, the marked Genera (\*) probably include cryptic species (see García-Morales & Elías-Gutiérrez, 2013; Gutiérrez-Aguirre *et al.*, 2014; Nandini *et al.*, 2019; Jiménez-Contreras *et al.*, 2017; Michaloudi *et al.*, 2018; Elías-Gutiérrez *et al.*, 2019; Montoliu-Elena *et al.*, 2019)

- Dussart, B. H. & D. Defaye. 1995. *Copepoda, Introduction to the Copepoda*, Guides to the identification of the microinvertebrates of the continental waters of the world, SPB Academic Publishing, Lieden 277 p.
- Elías-Gutiérrez, M., J. Ciro-Pérez, E. Suárez-Morales & M. Silva-Briano. 1999. The freshwater Cladocera (Orders Ctenopoda and Anomopoda) of México, with comments on selected taxa. *Crustaceana*, 72: 171-186.
- Elías-Gutiérrez, M., P. J. Jarucka, L. Montoliu-Elena, M. R. Miracle, A. Petrusek & V. Korinek. 2019. Who is *Moina micrura*? Redescription of one of the most confusing cladocerans from terra Typica, based on integrative taxonomy. *Limnetica*, 38(1). Doi: 10.23818/limn.38.18
- Elías-Gutiérrez, M., N. Smirnov, E. Suárez-Morales & N. Dimas-Flores. 2001. New and little known cladocerans (Crustacea: Anomopoda) from Southeastern Mexico, *Hydrobiologia*, 442: 41-54.
- Elías-Gutiérrez, M. & E. Suárez-Morales. 2003. Estado actual del conocimiento de los cladóceros de México, Pp. 171-184. In: M. T. Barreiro-Güemes, M. E. Meave del Castillo, M. Signoret-Poillon y M. G. Figueroa-Torres (Eds) *Planctología Mexicana*. Sociedad Mexicana de Planctología, A. C., México, 300 p.
- Elías-Gutiérrez, M., A. Kotov & T. Garfías-Espejo. 2006. Cladocera (Crustacea: Ctenopoda, Anomopoda) from Southern Mexico, Belize and northern Guatemala, with some biogeographical notes. *Zootaxa*, 1119: 1-27.
- Elías-Gutiérrez, M., E. Suárez-Morales, M. A. Gutiérrez-Aguirre, M. Silva-Briano, J. G. Granados Ramírez & T. Garfías Espejo. 2008. *Cladocera y Copepoda de las aguas continentales de México, guía ilustrada*. UNAM, CONABIO, ECOSUR, CONACYT, SEMARNAT. México 322 p.
- Elías-Gutiérrez, M. & M. E. Valdéz-Moreno. 2008. A new cryptic species of *Leberis* Smirnov, 1989 (Crustacea, Cladocera, Chydoridae) from the Mexican semi-desert region, highlighted by DNA barcoding. *Hidrobiológica*, 18: 63-74.
- García-Morales, A. E. & M. Elías-Gutiérrez. 2004. Rotifera from southeastern México, new records and comments on zoogeographic. *Anales del Instituto de Biología Universidad Nacional Autónoma de México. Serie Zoológica*, 75(1):99-120.
- García-Morales, A. E. & M. Elías-Gutiérrez. 2007. The Rotifer fauna of Guatemala and Belize: survey and biogeographical affinities. *Rev. Biol. Trop.*, 55(2): 569-584.
- García-Morales, A. E. & M. Elías-Gutiérrez. 2013. DNA barcoding of freshwater Rotifera in Mexico: Evidence of cryptic speciation in common rotifers. *Molecular Ecology Resources*, 13: 1097-1107.
- Garfías-Espejo, T. & M. Elías-Gutiérrez. 2003. Antecedentes históricos y lista comentada de los cladóceros presentes en México. *Scientia Naturae*, 6:69-88.

- Gutiérrez-Aguirre, M. A. & A. Cervantes-Martínez. 2013. Diversity of freshwater copepods (Maxillopoda: Copepoda; Calanoida, Cyclopoida) from Chiapas, Mexico with a description of *Mastigodiptomus suarezmoralesi* sp. nov. *J. Nat. Hist.*, DOI: 10.1080/00222933.2012.742587.
- Gutiérrez-Aguirre, M. A. & A. Cervantes-Martínez. 2016. Taxonomic evaluation of eleven species of *Microcyclops* Claus, 1893 (Copepoda, Cyclopoida) and description of *Microcyclops inarmatus* sp. n. from America. *ZooKeys*, 603: 33-69.
- Gutiérrez-Aguirre, M. A., A. Cervantes-Martínez & M. Elías-Gutiérrez. 2014. An example of how barcodes can clarify cryptic species: the case of the calanoid copepod *Mastigodiptomus albuquerquensis* (Herrick). *PLoS ONE*, 9(1): e85019. DOI: 10.1371/journal.pone.0085019.
- Gutiérrez-Aguirre, M. A., A. Cervantes-Martínez, M. Elías-Gutiérrez & A. Lugo Vázquez. 2020. Remarks on *Mastigodiptomus* (Calanoida: Diaptomidae) from Mexico using integrative taxonomy, with a key of identification and three new species. *PeerJ* 8:e8416, DOI 10.7717/peerj.8416
- Gutiérrez-Aguirre, M. A., N. F. Mercado-Salas & A. Cervantes-Martínez. 2013. Description of *Eucyclops tziscao* sp. n., *E. angeli* sp. n. and a new record of *E. festivus* Lindberg, 1955 (Cyclopoida, Cyclopidae, Eucyclopinae) in Chiapas, Mexico. *Zookeys*, 351: 1-30.
- Jiménez-Contreras, J., S.S.S. Sarma, E. Piedra Ibarra & S. Nandini. 2017. Morphometric and molecular (COX 1) variations of *Asplanchna girodi* clones from Central Mexico. *J. Environ. Biol.* 38, 1229-1239
- Mercado-Salas, N. & C. Álvarez-Silva. 2013. A new *Acanthocyclops* Kiefer, 1927 (Cyclopoida: Cyclopinae) from an ecological reserve in Mexico City. *Journal of Natural History*, 47(5-12): 499-515. doi: <http://dx.doi.org/10.1080/00222933.2012.742589>.
- Mercado-Salas, N., S. Khodami, T. C. Kihara. M. Elías-Gutiérrez & P. M. Arbizu. 2018. Genetic structures and distributional patterns of the genus *Mastigodiptomus* (Copepoda) in Mexico, with the description of a new species from the Yucatan Peninsula. *Arthropod Systematics & Phylogeny*, 76(3): 487-507
- Mercado-Salas, N. & E. Suárez-Morales. 2009. A new species and illustrated record of *Paracyclops* Claus, 1893 (Copepoda: Cyclopoida: Cyclopinae) from Mexico. *Journal of Natural History*, 43 (45-46): 2789-2808.
- Mercado-Salas, N. & E. Suárez-Morales. 2011. Morfología, diversidad y distribución de los Cyclopoida (Copepoda) de zonas áridas del centro-norte de México. I. Cyclopinae. *Hidrobiológica*, 21(1): 1-25.
- Mercado-Salas, N. & E. Suárez-Morales. 2014. On Kiefer's American *Eucyclops* (Copepoda, Eucyclopinae): redescrptions and comments on the historical records of *E. delachauxi*, *E. prionophorus*, *E. bondi* and *E. leptacanthus*. *Zookeys*, 402: 1-41.
- Mercado-Salas, N., E. Suárez-Morales, A. M. Maeda-Martínez & M. Silva-Briano. 2013. A new species of *Metacyclops* Kiefer, 1927 (Copepoda, Cyclopidae, Cyclopinae) from the Chihuahuan desert, northern Mexico. *Zookeys*, 287: 1-18.
- Mercado-Salas, N., E. Suárez-Morales & M. Silva-Briano. 2009. Two new species of *Acanthocyclops* Kiefer, 1927 (Copepoda: Cyclopoida: Cyclopinae) with pilose caudal rami from semiarid areas of Mexico. *Zoological studies*, 48: 380-393.
- Montoliu-Elena, L., M. Elías-Gutiérrez & M. Silva-Briano. 2019. *Moina macrocopa* (Straus, 1820): a species complex of a common Cladocera, highlighted by morphology and DNA barcodes. *Limnetica*, 38(1): 253-277. DOI: 10.23818/limn.38.19
- Mercado-Salas, N., E. Suárez-Morales & M. Silva-Briano. 2015. Taxonomic revision of the Mexican *Eucyclops* (Copepoda: Cyclopoida) with comments on the biogeography of the genus. *Journal of Natural History*, DOI: 10.1080/00222933.2015.1061715

- Michaloudi, E., S. Papakostas, G. Stamou, V. Nedela, E. Tihlaríková, W. Zhang, & S. A. J. Declerck. 2018. Reverse taxonomy applied to the *Brachionus calyciflorus* cryptic species complex: morphometric analysis confirms species delimitations revealed by molecular phylogenetic analysis and allows the (re) description of four species. PLoS ONE 13(9): e0203168. <https://doi.org/10.1371/journal.pone.0203168>
- Nandini, S., M. Silva-Briano, G. Garc -Garc a, S. S. S. Sarma, A. Adabache-Ort z & R. Galv n de la Rosa. 2009. First record of the temperate species *Daphnia curvirostris* Eylmann, 1887 emend. Johnson, 1952 (Cladocera: Daphniidae) in Mexico and its demographic characteristics in relation to algal food density. *Limnology*, 19(2): 87-94.
- Nandini S., F. Pe a-Aguado, U. Arregu n-Rebolledo, S.S.S. Sarma, & G. Murugan. 2019. Molecular identity and demographic responses to salinity of a freshwater strain of *Brachionus plicatilis* from the shallow lake P tzcuaro, M xico. *Fundam. Appl. Limnol.* 192, 319-329
- Rico-Mart nez, R. & M. Silva-Briano. Contribution to the knowledge of the rotifera of Mexico. *Hydrobiologia*, 255/256: 467-474.
- Sarma, S. S. S. 1999. Checklist of rotifers (rot fera) from Mexico. *Environment & Ecology*, 17: 978-983.
- Sarma, S. S. S., M. El as-Guti rrez & C. Serran a-Soto. 1996. Rotifers from high altitude crater-lakes at Nevado de Toluca volcano, Mexico. *Hidrobiol gica*, 6: 33-38.
- Sarma, S. S. S. & M. El as-Guti rrez. 1997. Taxonomic studies of freshwater rotifers (Rotifera) from Mexico. *Polskie Archiwum Hydrobiologii*, 44: 341-357.
- Sarma, S. S. S. & M. El as-Guti rrez. 1998. Rotifer diversity in a central Mexican pond. *Hydrobiologia*, 387/388: 47-54.
- Sarma, S. S. S. & M. El as-Guti rrez. 1999a. A survey on the rotifer (Rotifera) fauna of the Yucatan Peninsula (Mexico). *Rev. Biol. Trop.*, 47(Supl. 1): 187-196.
- Sarma, S. S. S. & M. El as-Guti rrez. 1999b. Rotifers (Rotifera) from four natural water bodies of central Mexico. *Limnologica*, 29: 475-483.
- Sarma, S.S.S., M. A. Jim nez-Santos and S. Nandini. 2021. Rotifer species diversity in Mexico: an updated checklist. *Diversity* 13, 291, DOI 10.3390/d13070291
- Segers, H. 2007. *Annotated checklist of the rotifers (Phylum Rotifera), with notes on nomenclature, taxonomy and distribution*. Magnolia Press, Auckland, New Zealand.
- Serran a-Soto, C. R. 1996. *Diversidad de Rot feros Monogonontos en algunos sistemas acu ticos del Estado de M xico*. Tesis Licenciatura. Universidad Nacional Aut noma de M xico, Los Reyes, Iztacala, Estado de M xico. M xico. 74 p.
- Silva-Briano, M., R. Galv n-de la Rosa, I. A. P rez-Legaspi & R. Rico-Mart nez. 2007. On the description of *Brachionus araceliae* sp. nov., a new species of freshwater rotifer from Mexico. *Hidrobiol gica*, 17: 179-183.
- Sinev, A. Y. & M. Silva-Briano. 2012. Cladocerans of genus *Alona* Baird, 1843 (Cladocera: Anomopoda: Chydoridae) and related genera from Aguascalientes State, Mexico. *Zootaxa*, 3569: 1-24.
- Sinev, A. Y. & E. Zawiska. 2013. Comments on cladocerans of crater lakes of the Nevado de Toluca Volcano (Central Mexico), with the description of a new species, *Alona manuela* sp. nov. *Zootaxa*, 3647(2): 390-400.
- Sinev, A. Y., K. Van Damme & A. A. Kotov. 2005. Redescription of tropical-temperate cladocerans *Alona diaphana* King, 1853 and *Alona davidi* Richard, 1895 and their traslocation to *Leberis* Smirnov, 1989 (Branchiopoda: Anomopoda: Chydoridae). *Arthropoda Selecta*, 14(3): 183-205.

- Suárez-Morales, E. & J. W. Reid. 1998. An updated list of the free-living freshwater copepods (Crustacea) of México. *The Southwestern Naturalist*, 43: 256-265.
- +Suárez-Morales, E. 2004. A new species of *Eucyclops* Claus (Copepoda: Cyclopoida) from Southeast Mexico with a key for the identification of the species recorded in Mexico. *Zootaxa*, 617: 1-18.
- +Suárez-Morales, E. & M. Elías-Gutiérrez 2003. Estado actual del conocimiento de los copépodos de aguas continentales de México, Pp. 157-170. *In: M. T. Barreiro-Güemes, M. E. Meave del Castillo, M. Signoret-Poillon y M. G. Figueroa-Torres (Eds) Planctología Mexicana*. Sociedad Mexicana de Planctología, A. C., México, 300 p.
- Suárez-Morales, E. & M. A. Gutiérrez-Aguirre. 2001. *Morfología y taxonomía de los Mesocyclops (Crustacea: Copepoda: Cyclopoida) de México*. El Colegio de la Frontera Sur y Consejo Nacional de Ciencia y Tecnología, México D. F. 202 p.
- Suárez-Morales, E. M. A. Gutiérrez-Aguirre & E. J. Walsh. 2010. Freshwater Copepoda (Crustacea) from the Chihuahuan desert with comments on biogeography, *The Southwestern Naturalist*. 55(4): 525-531
- Suárez-Morales, E. & T. M. Iliffe. 2005. A new *Stygonitocrella* Petkovski (Copepoda: Harpacticoida) from a cave in Northern Mexico with comments on the taxonomy of the genus. *Hydrobiologia*, 544: 215-228.
- Suárez-Morales, E. & J. W. Reid. 2003. An updated checklist of the continental copepod fauna of the Yucatán Peninsula, México, with notes on its regional associations. *Crustaceana*, 76: 977-991.
- Suárez-Morales, E., J.W. Reid & R. Gasca-Serrano. 2000. Copepoda, Pp 171-190. *In: J. Llorente-Busquets, E. González-Soriano y N. Papavero (Eds) Biodiversidad, taxonomía y biogeografía de artrópodos de México: hacia una síntesis de su conocimiento*. Universidad Nacional Autónoma de México, Comisión Nacional para el Conocimiento y Uso de la Biodiversidad, México.
- Suárez-Morales, E., J. W. Reid, T. M. Iliffe & F. Fiers. 1996. *Catálogo de los copépodos (Crustacea) continentales de la Península de Yucatán, México*, Comisión Nacional para el Conocimiento y Uso de la Biodiversidad (CONABIO) El Colegio de la Frontera Sur (ECOSUR), México 296 p.
- Suárez-Morales, E. & E. Walsh. 2009. Two new species of *Eucyclops* Claus (Copepoda: Cyclopoida) from the Chihuahuan desert with a description of *E. pseudoensifer* Dussart. *Zootaxa*, 2206: 1-22.
- Aladro-Lubel, M.A., Reyes-Santos, M., Olvera-Bautista, F., Robles-Briones, M.N., 2007. Ciliados y otros protozoos, in: Lot, A. (Ed.), Guía ilustrada de la Cantera Oriente. Caracterización ambiental e inventario biológico. Reserva Ecológica del Pedregal de San Ángel. Coordinación de la Investigación Científica, UNAM, pp. 97-122.
- Aladro-Lubel, M.A., Reyes-Santos, M., Olvera-Bautista, F., 2009. Diversidad de los protozoos ciliados. in: Lot, A., Cano-Santana, Z., (Eds.), Biodiversidad del ecosistema del Pedregal de San Ángel. Universidad Nacional Autónoma de México, México, pp. 61-68-
- Albores-Celorio, M.L., 1969. Contribución al conocimiento de los protozoarios phytomastigóforos de la laguna de Zempoala, Estado de Morelos. Universidad Nacional Autónoma de México, Facultad de Ciencias, p. 46.
- Arévalo-Navarro, R., 1999. Análisis y composición del zooplancton de la presa El Cueramal, municipio de Churumuco, Michoacán, México. Universidad Michoacana de San Nicolás Hidalgo, México, Facultad de Biología.



- Bravo-Hollis, H., 1922. Biología del *Chilodon cucullatus*. Rev. Mex. Biol. 3, 24-28.
- Bravo-Hollis, H., 1924. Contribuciones al conocimiento de los protozoarios mexicanos. VI. *Gastrostyla steinii* Engelmann. Rev. Mex. Biol. 4, 165-169.
- Cabral-Dorado, C., 2006. Variación espacio-temporal de los protozoos (Phylum Ciliophora) del lago urbano Tezozómoc. Universidad Nacional Autónoma de México, Facultad de Estudios Superiores Iztacala, p. 35.
- Elliott, A.M., Hayes, R.E., 1955. *Tetrahymena* from Mexico, Panama and Colombia, with special reference to sexuality. J. Protozool. 2, 75-80.
- Figuroa-Torres, M.G., Moreno-Ruiz, J.L., 2003. Dinoflagelados dulceacuícolas de México, in: Barreiro-Guemes, M.T., Meave del Castillo, M., Signoret-Poillon, M., Figuroa-Torres, M.G. (Eds.), Planctología mexicana. Sociedad Mexicana de Planctología, A. C., México, pp. 85-92.
- Flores-Flores, M.L., 2012. Estudio taxonómico de protozoos de vida libre (ciliados, rizópodos y euglenoideos) de un manantial y una caída de agua del Estado de México. Universidad Nacional Autónoma de México, Facultad de Ciencias, p. 81.
- Flores-Orta, L., 1983. Contribución al conocimiento de las algas dulceacuícolas de la Presa Cajón de Peña, Municipio de Tomatlán, Jalisco. Instituto Politécnico Nacional, p. 123.
- González-Labastida, M.E., 1995. Estudio de la variación espacial y temporal de los ciliados planctónicos de los lagos de Chapultepec, D.F. Universidad Nacional Autónoma de México, Escuela Nacional de Estudios Profesionales-Iztacala, p. 56.
- Hernández-Anaya, M., 1981. Ciliados de una laguneta de los médanos cercanos al Puerto de Veracruz. Universidad Nacional Autónoma de México, Facultad de Ciencias, p. 80.
- Kusell-Fetzmann, E., 1973. Beiträge zur Kenntnis der Algenflora der Hochgebirge Zentralamerikas und der nördlichen Anden. Hochgebirgsforschung 3, 29-68.
- López-Ochoterena, E., 1962. Protozoarios ciliados de México. *Stylonichia mytilus* Ehrenberg, 1838 y *Sphaerophrya sol* Metchnikoff, 1864. Un caso de parasitismo entre protozoarios. Acta Zool. Mex. 6, 1-6.
- López-Ochoterena, E., 1964. Protozoarios ciliados de México. XII. *Euplotes trisulcatus* Kahl, 1932 (Protozoa, Ciliata), colectado en aguas dulces del Valle de México. An. Esc. Nal. Cienc. Biol. Méx. 13, 67-72.
- López-Ochoterena, E., 1965. Ciliados mesosapróbicos de Chapultepec (Sistemática, morfología, ecología). Rev. Soc. Mex. Hist. Nat. 26, 115-246.

- López-Ochoterena, E., Barajas de López, E., 1964. Protozoarios ciliados de México. VIII. Morfología comparada de dos especies de "*Euplotes*" (Ciliata, Hypotrichida). Rev. Brasil. Biol. 24, 139-143.
- López-Ríos, G., 1972. Algunos aspectos biológicos de doce especies de protozoarios fitoflagelados del Lago de Xochimilco, D. F. Universidad Nacional Autónoma de México, Facultad de Ciencias, p. 36.
- Lugo-Vázquez, A., 1993. Estudio de las comunidades litorales de protozoarios en seis lagos crater del Estado de Puebla mediante el método de colonización de sustratos artificiales. Universidad Nacional Autónoma de México, Facultad de Ciencias, p. 76.
- Macek, M., Sánchez-Medina, X., Vilaclara, G., Lugo-Vázquez, A., Bautista-Reyes, F., Valdespino-Castillo, P.M., 2022. Protozooplankton. in: Alcocer, J. (ed.), Lake Alchichica limnology. Springer, Cham, 213-236. doi: 10.1007/978-3-030-79096-7\_13
- Madrazo-Garibay, M., López-Ochoterena, E., 1973. Protozoarios ciliados de México XIX. Estudio biológico de algunas especies recolectadas en Salto de San Antón, Estado de Morelos. Rev. Soc. Mex. Hist. Nat. 34, 63-69.
- Madrazo-Garibay, M., López-Ochoterena, E., 1985. Protozoarios ciliados de México. XXVI. Análisis morfológico y taxonómico de treinta y cinco especies de la laguna de Términos, Campeche. An. Inst. Cienc. Mar Limnol. Univ. Nal. Autón. Méx. 12, 199-212.
- Madrazo-Garibay, M., López-Ochoterena, E., 1986. Protozoarios ciliados de México. XXVIII. Características morfológicas y taxonómicas de veinticinco especies de la Laguna Pom, Campeche, México. An. Inst. Cienc. Mar Limnol. Univ. Nal. Autón. Méx. 13, 29-38.
- Madrazo-Garibay, M., López-Ochoterena, E., 1990. Contribución al conocimiento de la fauna (Phylum Sarcomastigophora) de la Laguna de Términos, Campeche y el sistema fluvio-lagunar Atasta-Pom. Rev. Soc. Mex. Hist. Nat. 41, 25-32.
- Marrón-Aguilar, M.A., López-Ochoterena, E., 1969. Protozoarios ciliados de México XVI. Sistemática de algunas especies del orden Tintinnida Kofoid y Campbell, de la laguna de Términos, Campeche. Rev. Soc. Mex. Hist. Nat. 30, 43-64.
- Méndez-Sánchez, D., 2014. Ciliados de vida libre (Protozoa:Ciliophora) del humedal Atarasquillo Lerma, Estado de México. Universidad Autónoma del Estado de México, Facultad de Ciencias, p. 85.
- Méndez-Sánchez, D., 2017. Estudio taxonómico de ciliados de vida libre (Alveolata: Ciliophora) en cuerpos de agua dulce de dos regiones biogeográficas de México. Universidad Nacional Autónoma de México, Facultad de Ciencias, p. 149.
- Méndez-Sánchez, D., Mayén Estrada, R., Luo, X., Hu, X., 2018. A new subspecies of *Oxytricha granulifera* (Hypotrichia: Oxytrichidae) from Mexico, with notes on its morphogenesis and phylogenetic position. J. Eukaryot. Microbiol. 65, 357-371.

- Mendoza-González, A.C., 1973. Estudio florístico ficológico estacional de la laguna de Victoria de Santiago Tilapa, Estado de México. Instituto Politécnico Nacional, Escuela Nacional de Ciencias Biológicas, p. 153.
- Moreno-Ruiz, J.J., 1985. Contribución al estudio básico (análisis inicial de la diversidad alimenticia) de *Ictiobus meridionalis* Günther (Cipriniformes: Catostomidae) en algunas localidades de la cuenca baja del Río Papaloapan. Universidad Nacional Autónoma de México, Facultad de Ciencias, p. 27.
- Nomdedeu, O.V., López-Ochoterena, E., 1988. Protozoarios ciliados de México XXXII. Estudio ecológico de algunas especies para estimar el grado de contaminación del Río la Magdalena, México, D.F. An. Inst. Cienc. Mar Limnol. Univ. Nal. Autón. Méx. 15, 229-236.
- Osorio-Tafall, B.F., 1941. Materiales para el estudio del microplancton del Lago de Pátzcuaro (México). An. Esc. Nal. Cienc. Biol. Méx., 2, 331-383.
- Osorio-Tafall, B.F., 1942. Estudios sobre el plancton de México. El género *Lophodinium* Lemm. Ciencia 3, 114-119.
- Osorio-Tafall, B.F., 1944. Biodinámica del lago de Pátzcuaro. I. Ensayo de interpretación de sus relaciones tróficas. Rev. Soc. Mex. Hist. Nat. 5, 197-227.
- Pérez-Reyes, R., Salas-Gómez, E., 1961. Protozoarios encontrados en colecciones de agua del Valle de México. An. Esc. Nal. Cienc. Biol. Méx. 10, 39-44.
- Peštová, D., Macek, M., Martínez-Pérez, M.E., 2008. Ciliates and their picophytoplankton-feeding activity in a high-altitude warm-monomictic saline lake. Europ. J. Protistol. 44, 13-25.
- Ponce-Márquez, M.E., Ramírez-Rodríguez, R., Ramírez-Vázquez, M., 2019. Algas de la Cantera Oriente, Reserva Ecológica del Pedregal de San Ángel. Guía de Campo y Laboratorio. Las Prensas de Ciencias, Facultad de Ciencias, Universidad Nacional Autónoma de México. 152p.
- Potekhin, A., Mayén-Estrada, R., 2020. *Paramecium* diversity and a new member of the *Paramecium aurelia* species complex described from Mexico. Diversity. 12, 197.
- Ramírez de Guerrero, A., 1970. Sistemática y morfología de algunas especies de protozoarios del Estado de Puebla, México. Rev. Soc. Mex. Hist. Nat. 31, 69-94.
- Saadi-González, K.V., 2018. Dinámica temporal comparada de los ciliados en los cuerpos de agua de la cantera oriente, CDMX (REPSA). Universidad Nacional Autónoma de México, Facultad de Estudios Superiores Iztacala, p. 68.
- Sámamo, B.A., Sokoloff, D., 1931. La flora y fauna de aguas dulces del Valle de México. Monog. Inst. Biol. Méx. 1, 5-49.

- Sánchez-Rodríguez, M.R., Lugo-Vázquez, A., Oliva-Martínez, M.G., Verver y Vargas García, J., Rodríguez-Rocha, A., Peralta-Soriano, L., 2011. Planktonic ciliates in a hypertrophic pond: functional role and importance. *J. Environ. Biol.* 32, 497-503.
- Sigala-Regalado, I., 2008. Registro protozoológico en cinco biotopos de la cueva de Los Riscos, Querétaro, México. Universidad Nacional Autónoma de México, Facultad de Ciencias, p. 110.
- Sokoloff, D., 1930a. *Stentor oligonucleatus* sp. nov. *An. Inst. Biol. UNAM.* 1, 265-266.
- Sokoloff, D., 1930b. Las particularidades del *Stentor viridis* de Xochimilco. *An. Inst. Biol. UNAM.* 1, 83-89.
- Sokoloff, D., 1931. Un nuevo infusorio ciliado de agua dulce. *An. Inst. Biol. UNAM.* 2, 165-166.
- Sokoloff, D., 1936. Análisis hidrobiológico del manantial de la "Mora" de Actopan, Hidalgo. Ciliata, Flagellata, Rhizopoda. *An. Inst. Biol. UNAM.* 7, 287-303.
- Tiscareño-Silva, R., 2008. Protozoos: ciliados y sarcodinos, in: Villegas, H.A., Angón, A.C. (eds.), La biodiversidad de Aguascalientes. Estudio de Estado. Comisión Nacional para el conocimiento y uso de la Biodiversidad, México, pp. 118-120.
